# Supplementary material
Source: PubMed Central journal article supplement (PMC1766418)

**A**

Major  
H2A.Z  
Merged

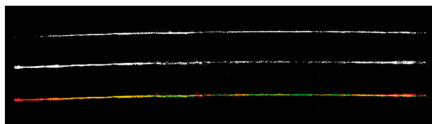

Major  
H2A  
Merged

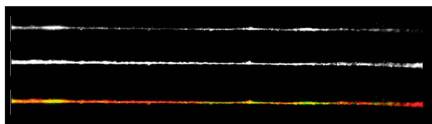

Major  
H3-K4.2xMe  
Merged

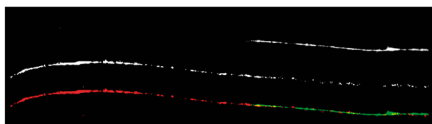

Major  
H3-K9.3xMe  
Merged

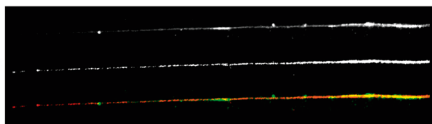**B**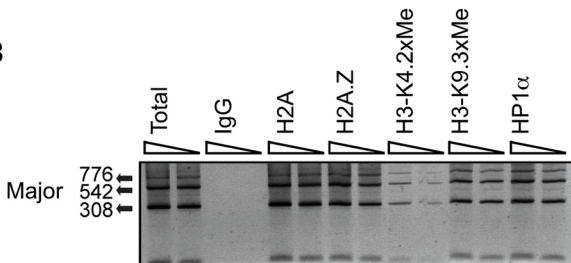

Supplement: pnas_0607870104_1.pdf [file pnas_0607870104_1.pdf]

**A**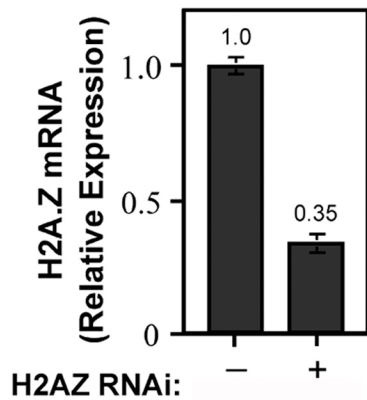**B**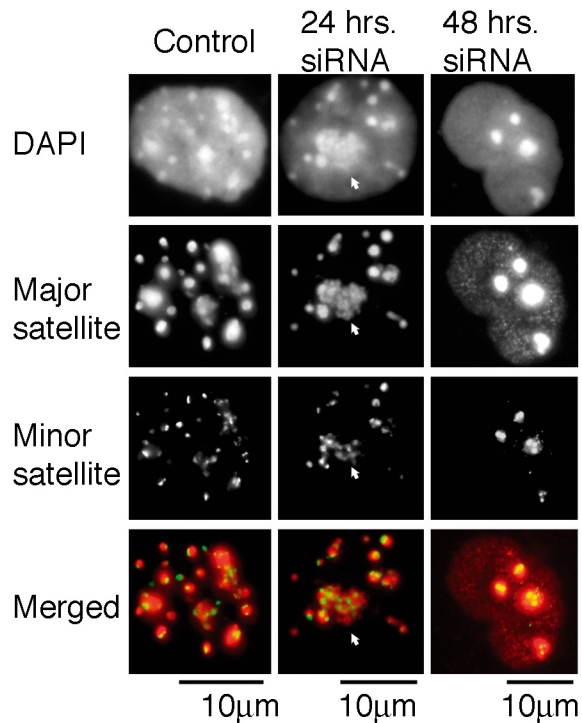**C**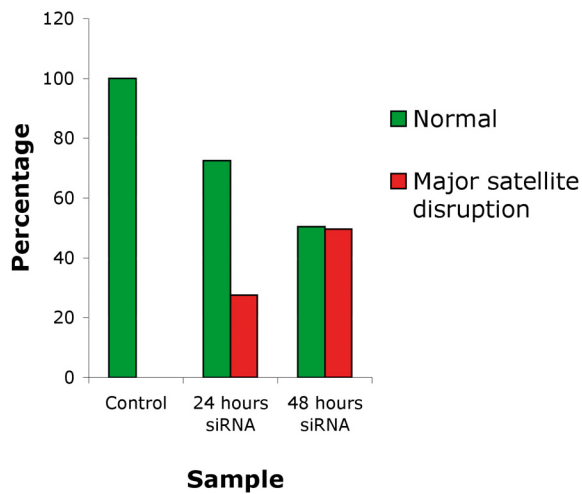

Supplement: pnas_0607870104_2.pdf [file pnas_0607870104_2.pdf]

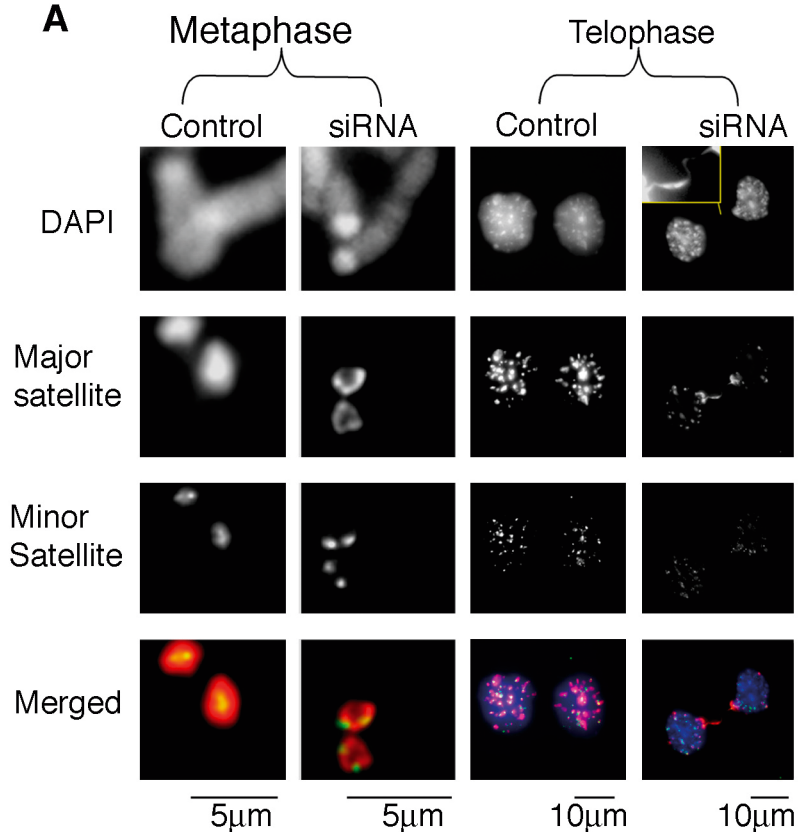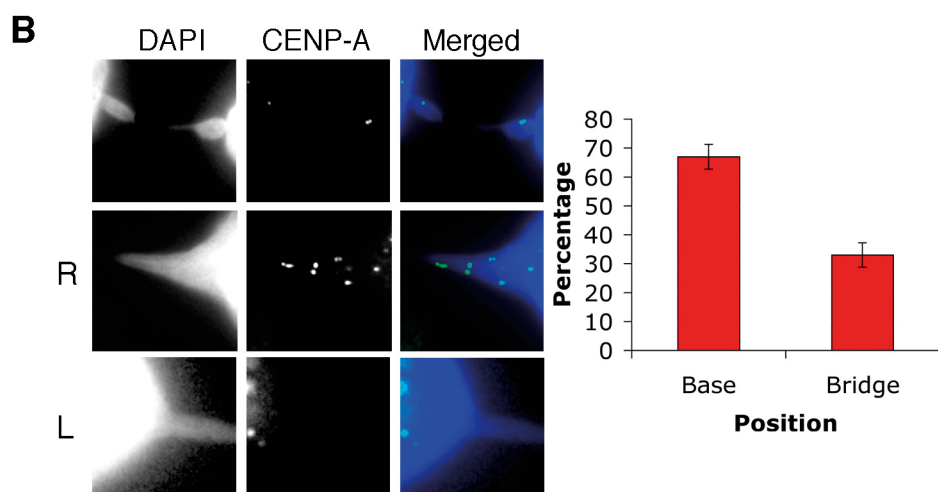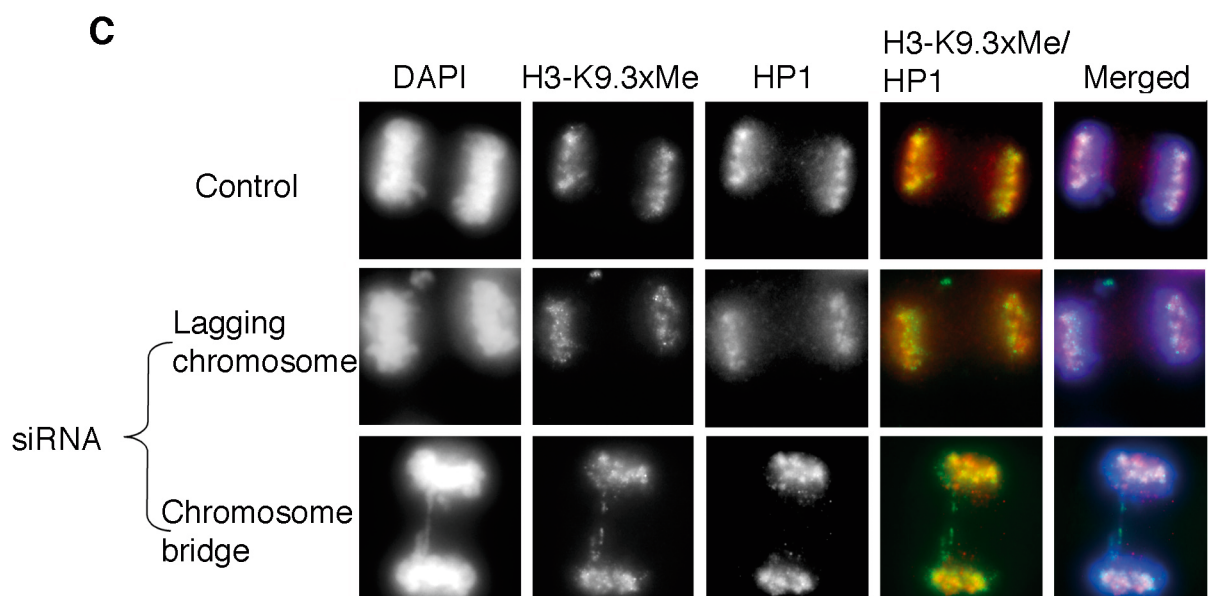

Supplement: pnas_0607870104_3.pdf [file pnas_0607870104_3.pdf]

**A**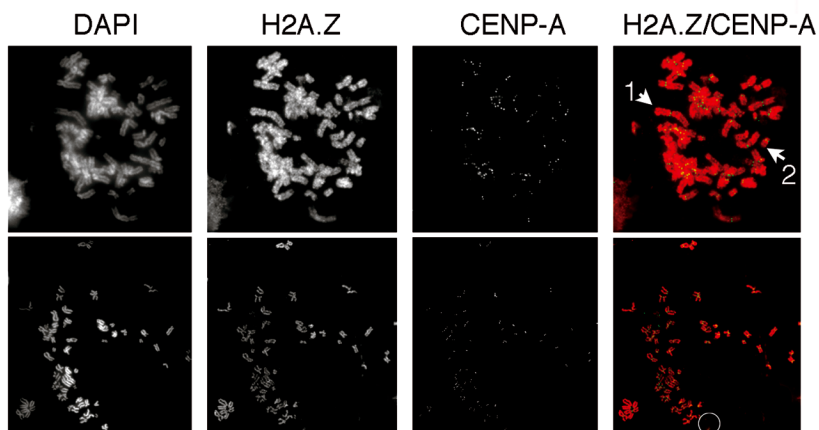**B**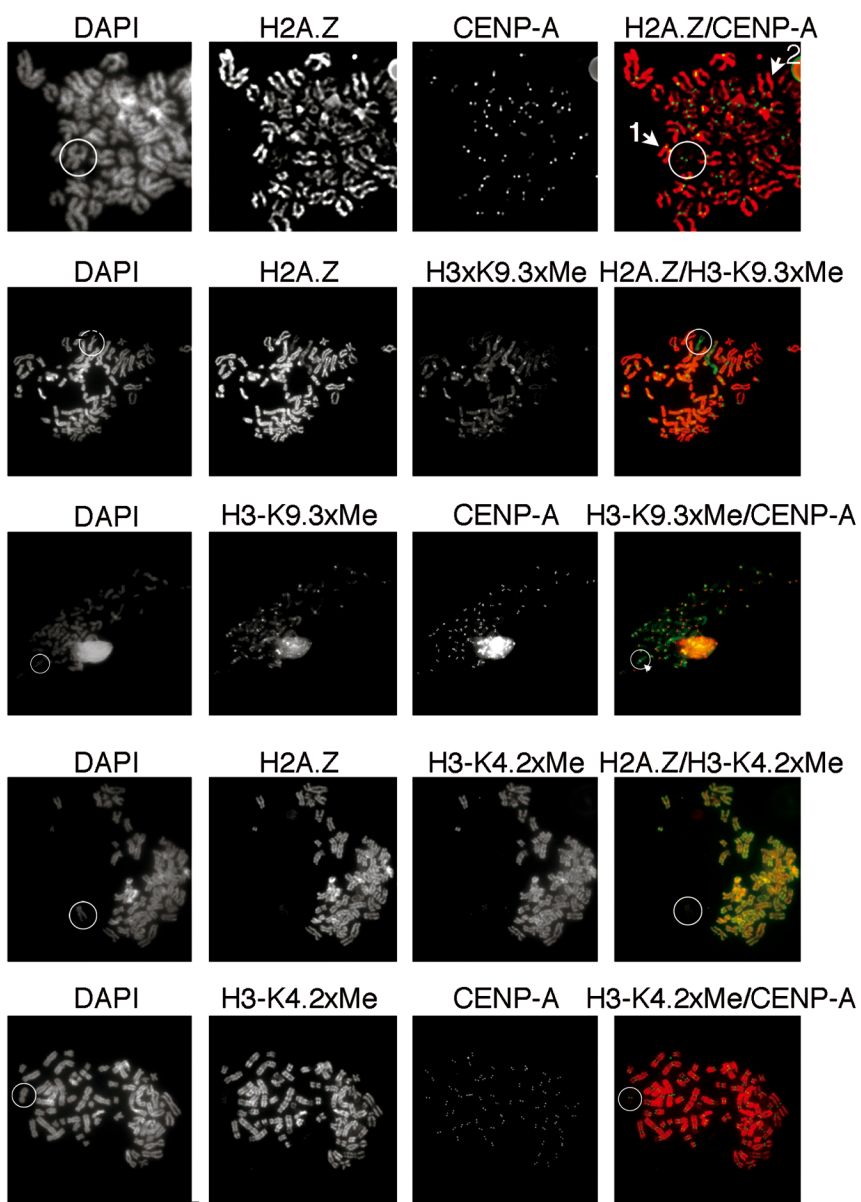

Supplement: pnas_0607870104_4.pdf [file pnas_0607870104_4.pdf]

**A**

H2A.Z/CENP-A

1

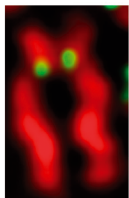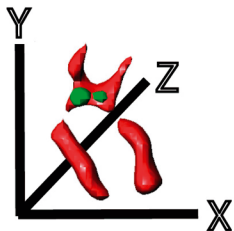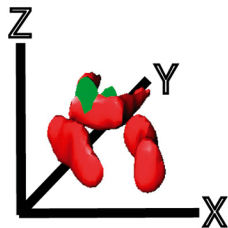

H2A.Z/CENP-A

2

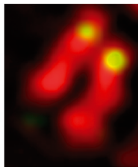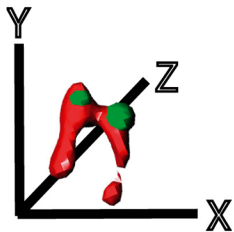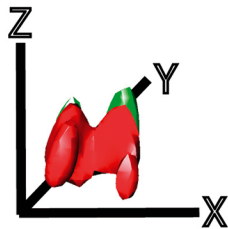

Supplement: pnas_0607870104_5.pdf [file pnas_0607870104_5.pdf]
